# Psychiatric Services

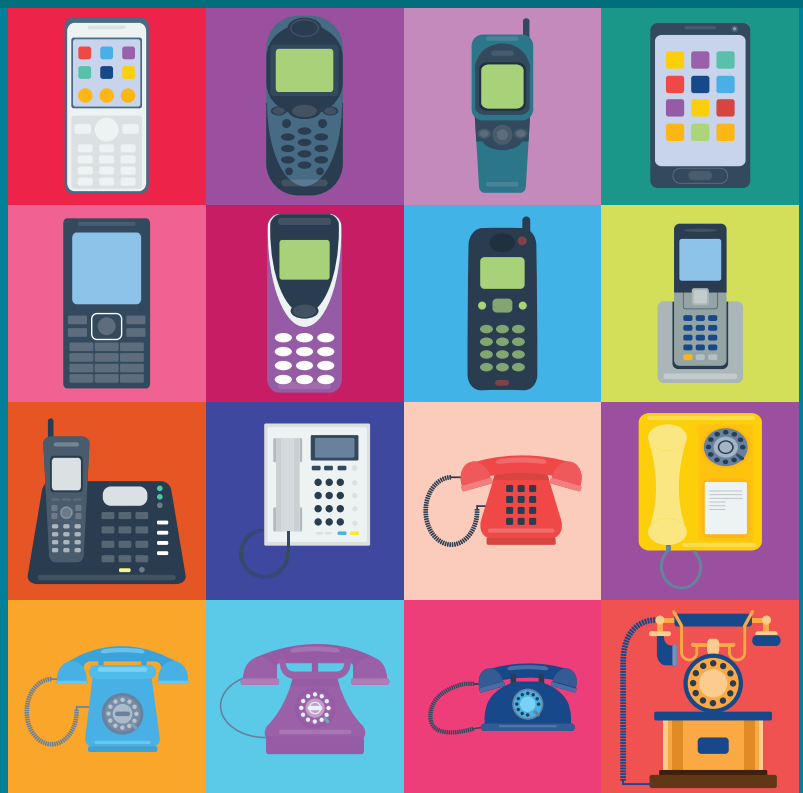

Using telemedicine to improve medication adherence and rural health

Mental health self-directed care financing

Custody issues for parents with serious mental illness
