# New and Essential Geriatric Psychiatry Titles

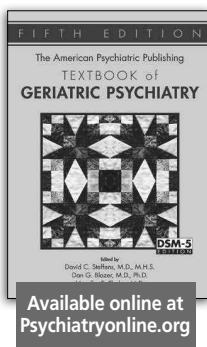

## The American Psychiatric Publishing Textbook of Geriatric Psychiatry, Fifth Edition

*Edited by David C. Steffens, M.D., M.H.S., Dan G. Blazer, M.D., Ph.D., and Mugdha E. Thakur, M.D.*

This Fifth Edition is an indispensable resource for psychiatric clinicians and trainees charged with assessing, diagnosing, and treating mental disorders. Building on the prodigious strengths of previous editions, this revision is the most current, comprehensive, and systematic textbook of geriatric psychiatry available today, and the only one that is DSM-5® concordant.

Widely recognized as the standard in its field, the book serves a critical need for clinicians challenged to meet the mental health needs of an aging population.

2015 • 837 pages • ISBN 978-1-58562-484-3 • Hardcover • \$192.00 • Item #62484

2015 • 837 pages • ISBN 978-1-58562-522-2 • eBook • \$154.00 • Item #62522

2015 • 12 Month Subscription • Online at Psychiatryonline.org • \$166.00 • Item #537005

**NEW!**

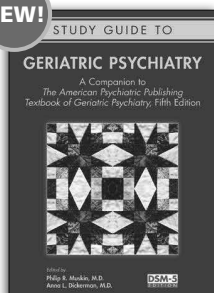

## Study Guide to Geriatric Psychiatry

*A Companion to The American Psychiatric Publishing Textbook of Geriatric Psychiatry, Fifth Edition*

*Philip R. Muskin, M.D., and Anna L. Dickerman, M.D.*

*Study Guide to Geriatric Psychiatry* is a question-and-answer companion that allows you to evaluate your mastery of the subject matter as you progress through *The American Psychiatric Publishing Textbook of Geriatric Psychiatry*, Fifth Edition. The *Study Guide* is made up of approximately 255 questions divided into 25 individual quizzes that correspond to chapters in the textbook. Questions are followed by an answer guide that references relevant text in the textbook. Each answer is accompanied by a discussion that addresses the correct response and also explains why other responses are not correct.

2017 • 352 pages • ISBN 978-1-61537-045-0 • Paperback • \$62.00 • Item #37045

2017 • 352 pages • ISBN 978-1-61537-106-8 • eBook • \$49.95 • Item #37106

**NEW!**

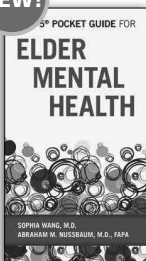

## DSM-5® Pocket Guide for Elder Mental Health

*Sophia Wang, M.D., and Abraham M. Nussbaum, M.D., FAPA*

The *DSM-5 Pocket Guide for Elder Mental Health* is an easily understandable tool for psychiatric and non-psychiatric professionals. It captures the essence of geriatric principles including care coordination, functional status, and the well-being of the caregiver as well as the patient in the context of well-crafted case scenarios. Drs. Wang and Nussbaum have truly operationalized the DSM-5 for geriatric providers and patients.

2017 • 375 pages • ISBN 978-1-61537-056-6 • Paperback • \$65.00 • Item #37056

2017 • 375 pages • ISBN 978-1-61537-119-8 • eBook • \$52.00 • Item #37119

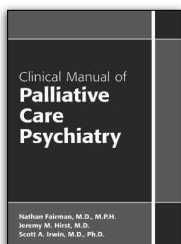

## Clinical Manual of Palliative Care Psychiatry

*Nathan Fairman, M.D., M.P.H., Jeremy M. Hirst, M.D., and Scott A. Irwin, M.D., Ph.D.*

The book seeks to bridge the gulf between principles and practice for two groups of clinicians: front-line palliative care providers with little mental health training and mental health specialists who may lack familiarity with palliative care practice. The book reviews palliative care principles and practice models, treatment of the psychiatric symptoms most commonly encountered in palliative care settings.

2016 • 297 pages • ISBN 978-1-58562-476-8 Paperback • \$61.00 • Item #62476

2016 • 297 pages • ISBN 978-1-61537-061-0 • eBook • \$48.95 • Item #37061

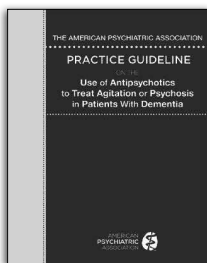

## The American Psychiatric Association Practice Guideline on the Use of Antipsychotics to Treat Agitation or Psychosis in Patients With Dementia

*American Psychiatric Association*

The guideline offers clear, concise, and actionable recommendation statements to help clinicians to incorporate recommendations into clinical practice, with the goal of improving quality of care. Each recommendation is given a rating that reflects the level of confidence that potential benefits of an intervention outweigh potential harms.

2016 • 218 pages • ISBN 978-0-89042-677-7 • Paperback • \$65.00 • Item #2677

2016 • 218 pages • ISBN 978-0-89042-678-4 • eBook • \$52.00 • Item #2678

# Office-Based Buprenorphine Treatment of Opioid Use Disorder, Second Edition

Edited by John A. Renner Jr., M.D., Petros Levounis, M.D., M.A., and Anna T. LaRose, M.D.

As the epidemic of opioid misuse and overdose deaths grows in the United States, practical information on evidence-based treatment of opioid use disorder (OUD) becomes increasingly important. This second edition of *Office-Based Buprenorphine Treatment of Opioid Use Disorder* offers just that: accessible and applicable guidance for anyone interested in learning more about prescribing buprenorphine.

Bulleted clinical pearls at the end of each chapter, as well as specific clinical recommendations and detailed case discussions throughout the book, make it easier for readers to retain knowledge and integrate it into their practice.

The guide also features sample documentation and scales, including a treatment contract and a patient consent, that can be used to model documents in practice.

Among the updates in this new edition are chapters that address other pharmacotherapies useful in treating OUD, including methadone and naltrexone, as well as OUD treatment in the context of women's health and pregnancy. As an added bonus, this edition can also be used to complete the 8 hours of qualifying training required for the buprenorphine waiver. By a thorough reading of the material covered in the chapters of this book and successful completion of the posttest, physicians can meet the buprenorphine waiver training requirement.

**JUST PUBLISHED!**

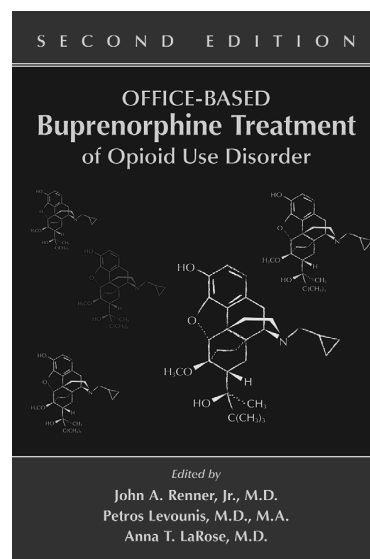

2018 • 395 pages • ISBN 978-1-61537-083-2 • Paperback • \$79.00 • Item #37083  
2018 • 395 pages • ISBN 978-1-61537-170-9 • eBook • \$63.00 • Item #37170

AMERICAN  
PSYCHIATRIC  
ASSOCIATION  
PUBLISHING

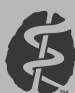

Order online @ [www.appi.org](http://www.appi.org)  
or Call Toll Free: 1-800-368-5777  
Email: [appi@psych.org](mailto:appi@psych.org)

20% Discount for American Psychiatric Association Members  
25% Discount for APA Resident-Fellow Members

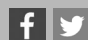

Priority Code AH1813A

Visit [ps.psychiatryonline.org](http://ps.psychiatryonline.org) for these features!

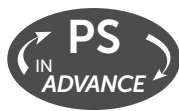

Discover the latest research before it appears in print

## Sustainability of an Evidence-Based Practice in Community Mental Health Agencies Serving Children

## Identifying Social Skills That Support Housing Attainment and Retention Among Homeless Persons With Serious Mental Illness

## Barriers Faced by Physicians in Screening for Substance Use Disorders Among Adolescents

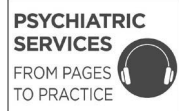

Listen to our podcast, *Psychiatric Services From Pages to Practice*, and learn about the latest mental health services research and why it is relevant.

**Episode 21: Technology:** Using text messaging for postpartum depression screening; improving medication adherence with telemedicine; Internet searching for patient information

Receive free alerts to new content, including Editor's Choice curated topic collections (<http://appi.org/etocs>).

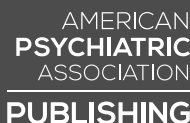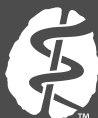

# ps.psychiatryonline.org

[www.appi.org](http://www.appi.org) • 1-800-368-5777 • e-mail: [appi@psych.org](mailto:appi@psych.org)

Keep up with the latest from *Psychiatric Services* on Facebook ([facebook.com/PsychiatryOnline](https://facebook.com/PsychiatryOnline)) and Twitter (@APAPubPsychSvcs).

## FREE Online Subscription to *Psychiatric Services* for APA Resident-Fellow Members (RFMs)!

American Psychiatric Association Resident-Fellow Members (RFMs) can receive a free online subscription to *Psychiatric Services*.

Visit [ps.psychiatryonline.org](http://ps.psychiatryonline.org) for full-text access to all of the content in this highly ranked, peer-reviewed monthly journal. *Psychiatric Services* focuses on service delivery in organized systems of care, evolving best practices, and federal and state policies that affect the care of people with mental illnesses.

Please visit [ps.psychiatryonline.org](http://ps.psychiatryonline.org) and log in with your APA username and password.

Psychiatry residents who are not currently APA Resident-Fellow Members should consider membership in the American Psychiatric Association. The benefits provided to residents are an example of how the APA serves the needs of its members throughout their careers. The low introductory dues APA extends to RFMs are even waived for the first year. Please visit [www.psychiatry.org/join-apa](http://www.psychiatry.org/join-apa) for more information.

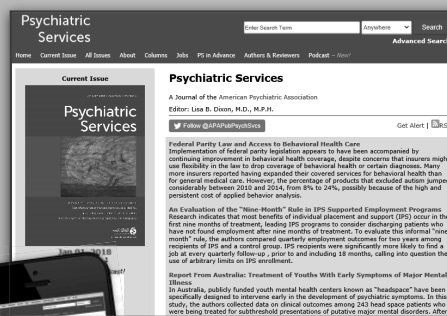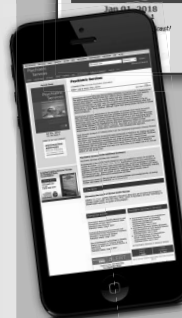

Tune in to our monthly podcast.

**PSYCHIATRIC SERVICES**  
FROM PAGES TO PRACTICE

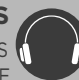

AMERICAN PSYCHIATRIC ASSOCIATION PUBLISHING

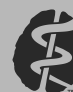

Follow @APAPubPsychSvcs

**The American Psychiatric Association  
Publishing Textbook of Psychosomatic  
Medicine and Consultation-Liaison  
Psychiatry, Third Edition**

**Just  
Published!**

*Edited by James L. Levenson, M.D.*

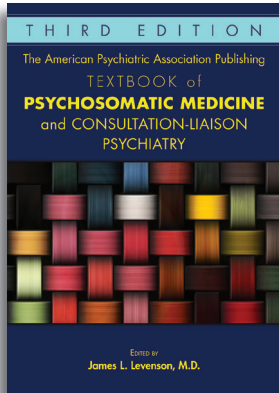

This book is an essential resource for psychiatry residents, psychosomatic medicine fellows, attending psychiatrists, and other specialists who need to stay up to date with the rapidly expanding evidence base in the field.

2019 • 1,594 pages • ISBN 978-1-61537-136-5 • Hardcover • \$225.00 • Item #37136  
2019 • 1,594 pages • ISBN 978-1-61537-199-0 • eBook • \$180.00 • Item #37199

AMERICAN  
PSYCHIATRIC  
ASSOCIATION  
PUBLISHING

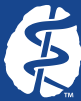

www.appi.org  
Email: appi@psych.org  
Phone: 1-800-368-5777

AH1840A

**PERFECT  
FIT**

**JOIN THE TEAM**

- Largest and most exciting mental health department in the country
- Many avenues for advancement
- Flexible hours and unparalleled work-life balance
- Competitive salary with potential bonuses of up to **\$32,000 annually**
- Student loan repayment incentive of up to **\$250,000**
- Reimbursement of eligible relocation costs of up to **\$15,000**

**LOS ANGELES COUNTY  
DEPARTMENT  
OF MENTAL HEALTH**

[www.psychiatristjobs.la](http://www.psychiatristjobs.la)

**Culture, Heritage, and Diversity  
in Older Adult Mental Health Care**

**NEW!**

**Edited by Maria Llorente, M.D., FAPA  
APA Council on Geriatric Psychiatry**

The term culture is multifaceted and may refer to one's belief system, values, religion, race, socioeconomic status, ethnicity, language, sexual orientation, geographic location, educational level, age, occupational risks and exposures, and gender. Cultural competence in health care systems is defined as the ability to understand and integrate the features listed above into the provision of health care services. *Culture, Heritage, and Diversity in Older Adult Mental Health Care* prepares clinicians to provide sensitive, high-quality, culturally competent care to geriatric patients from diverse backgrounds and will prove indispensable as patient demographics continue to change.

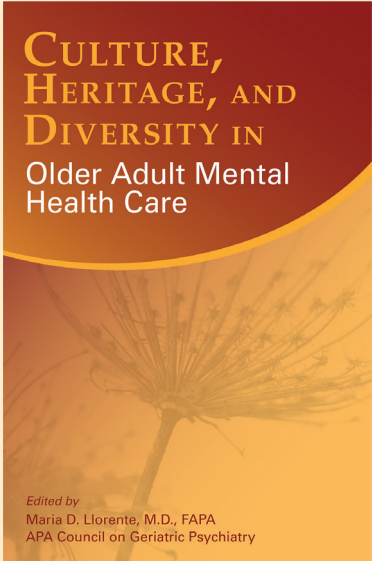

AMERICAN  
PSYCHIATRIC  
ASSOCIATION  
PUBLISHING

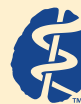

appi.org  
Email: appi@psych.org  
Toll Free: 1-800-368-5777

**20% Discount for American Psychiatric Association Members  
25% Discount for APA Resident-Fellow Members**

2019 • 320 pages  
ISBN 978-1-61537-205-8  
Paperback • \$57.00  
Item #37205

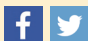

Priority Code AH1832

# Searching for the perfect psychiatric career?

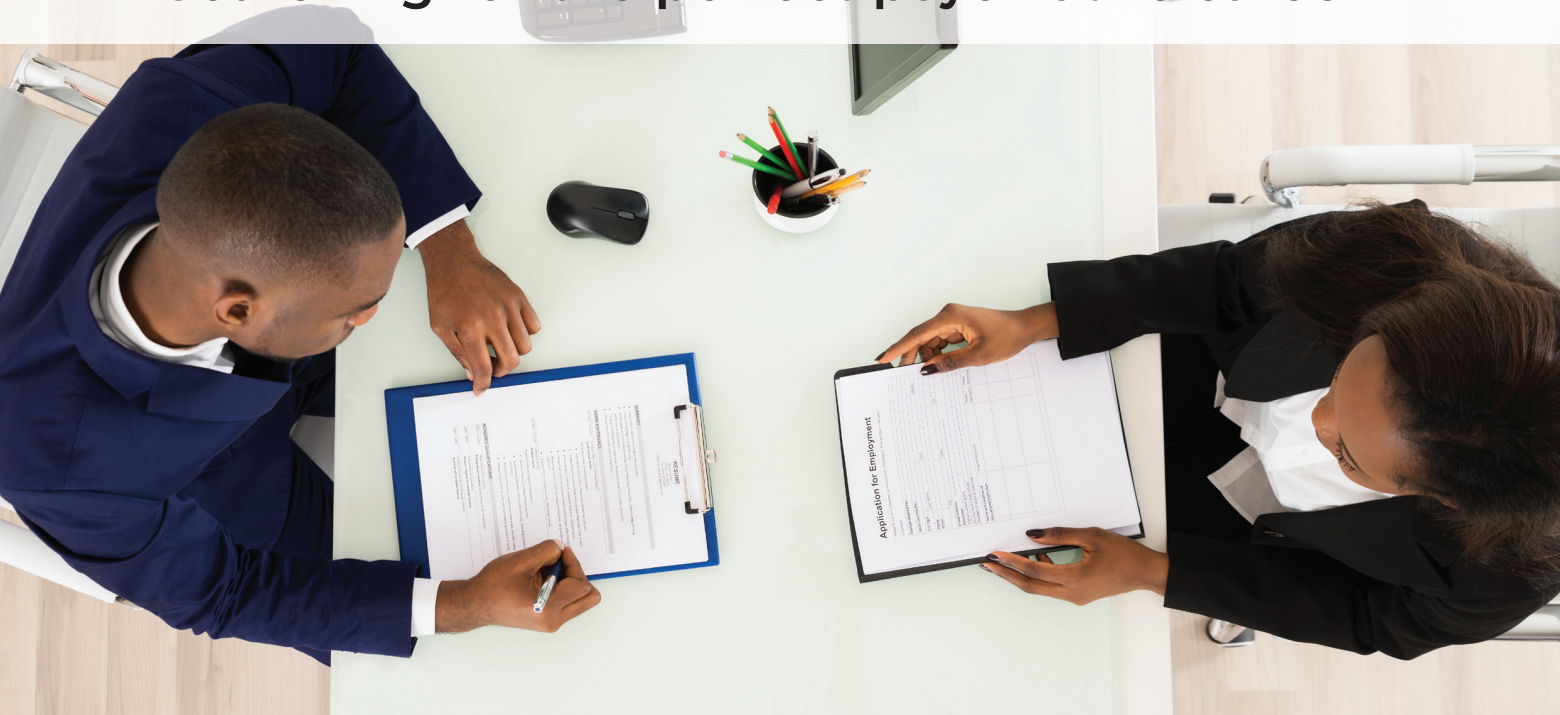

## Let APA JobCentral help!

### Manage Your Career

- Browse hundreds of active job listings!
- Create an account to save jobs, store multiple resumes and cover letters and communicate with employers through our internal messaging system.
- Set up multiple job alerts specifying your skills, interests and location to receive e-mails when employers post jobs that match your criteria.

### Recruit for Open Positions

- Post your job in front of thousands of highly qualified psychiatrists.
- Cross promote your job listing in Psychiatric News.
- Search the anonymous resume database to find your ideal candidate.

AMERICAN  
PSYCHIATRIC  
ASSOCIATION

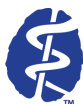

**JOBCENTRAL**  
The Career Hub for Psychiatry

[jobs.psychiatry.org](http://jobs.psychiatry.org)
