# New Titles in Child and Adolescent Psychiatry

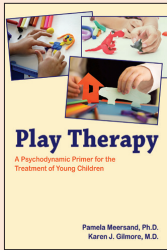

## Play Therapy

*A Psychodynamic Primer for the Treatment of Young Children*

Pamela Meersand, Ph.D., and Karen J. Gilmore, M.D.

This book provides a contemporary, comprehensive exploration of the theory and technique of psychoanalytically oriented play therapy, reflecting recent shifts in psychoanalytic theory and incorporating relevant information from neighboring fields, such as developmental science. The first half of the

volume tackles major theoretical issues, such as the role of play in human development and the impact of contemporary techno-culture on play, while the second half offers pragmatic guidance on conducting play treatment and handling the complexities of treating young children, including initiating treatment, working with parents, and managing aggression in the playroom. Throughout, a variety of clinical vignettes illustrate childhood behaviors, common dilemmas, and potential therapist responses. For ease of reference, a summary of key concepts and a glossary of key terms are provided at the end of each chapter.

2018 • 484 pages • ISBN 978-1-61537-043-6 • Paperback • \$78.00 • Item #37043

2018 • 484 pages • ISBN 978-1-61537-144-0 • eBook • \$62.00 • Item #37144

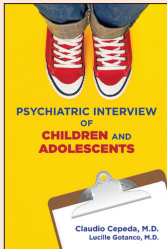

## Psychiatric Interview of Children and Adolescents

Claudio Cepeda, M.D., and Lucille Gotanco, M.D.

This book, building on the success of its predecessor and offers updated and revised material, as well as expanded coverage that includes new findings and addresses emerging issues in the field. For example, a new chapter focusing on the psychiatric evaluation of preschoolers and very

young children has been added, and the section on bullying in the chapter on abuse has been expanded to include cyber bullying.

2017 • 514 pages • ISBN 978-1-61537-048-1 • Paperback • \$79.00 • Item #37048

2017 • 514 pages • ISBN 978-1-61537-117-4 • eBook • \$63.00 • Item #37117

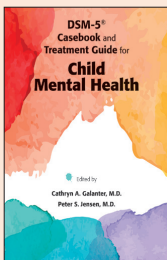

## DSM-5® Casebook and Treatment Guide for Child Mental Health

Edited by Cathryn A. Galanter, M.D., and Peter S. Jensen, M.D.

This guide is a rich repository of clinical wisdom that seasoned practitioners, clinicians early in training, and child and adolescent psychiatrists studying for their board exams will find extremely useful.

2017 • 452 pages • ISBN 978-1-58562-490-4  
Paperback • \$79.00 • Item #62490

2017 • 452 pages • ISBN 978-1-61537-060-3 • eBook • \$63.00 • Item #37060

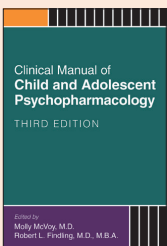

## Clinical Manual of Child and Adolescent Psychopharmacology, Third Edition

Edited by Molly McVoy, M.D., and Robert L. Findling, M.D., M.B.A.

The new, third edition of the *Clinical Manual of Child and Adolescent Psychopharmacology* has been thoroughly revised, yet its mission remains the same: to keep clinicians up-to-date on the latest research so that they can provide state-of-the-art care to their young patients.

2017 • 545 pages • ISBN 978-1-61537-044-3 • Paperback • \$82.00 • Item #37044

2017 • 545 pages • ISBN 978-1-61537-126-6 • eBook • \$66.00 • Item #37126

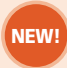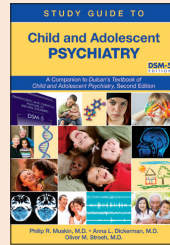

## Study Guide to Child and Adolescent Psychiatry

*A Companion to Dulcan's Textbook of Child and Adolescent Psychiatry, Second Edition*

Philip R. Muskin, M.D., and Anna L. Dickerman, M.D.

This is a question-and-answer companion that allows you to evaluate your mastery of the subject matter as you progress through *Dulcan's Textbook of Child and Adolescent Psychiatry*, Second Edition. Questions are followed by an answer guide that references relevant text (including page numbers) in the textbook to allow quick access to needed information. Each answer is accompanied by a discussion that not only addresses the correct response but also explains why other responses are not correct.

2018 • 350 pages • ISBN 978-1-61537-115-0 • Paperback • \$64.00 • Item #37115

2018 • 350 pages • ISBN 978-1-61537-182-2 • eBook • \$51.00 • Item #37182

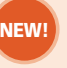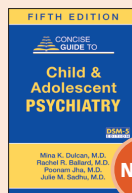

## Concise Guide to Child and Adolescent Psychiatry, Fifth Edition

Mina K. Dulcan, M.D., Rachel R. Ballard, M.D., Poonam Jha, M.D., and Julie M. Sadhu, M.D.

Updated to reflect significant changes to psychiatric nomenclature and criteria in DSM-5, this edition prunes older content while distilling and incorporating clinically relevant findings. Reorganized chapters feature tables of selected diagnostic criteria from the DSM-5 for quick reference. Sections on specific disorders and clinical situations include brief descriptions of relevant treatment methods. An informative chapter is devoted specifically to pharmacological therapies and their use in a range of disorders.

2018 • 478 pages • ISBN 978-1-61537-078-8 • Paperback • \$58.00 • Item #37078

2018 • 478 pages • ISBN 978-1-61537-145-7 • eBook • \$46.50 • Item #37145

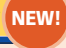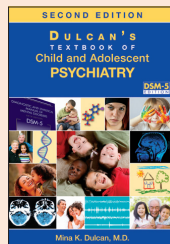

## Dulcan's Textbook of Child and Adolescent Psychiatry, Second Edition

Edited by Mina K. Dulcan, M.D.

Available online at [Psychiatryonline.org](http://Psychiatryonline.org)!

2016 • 1,205 pages • ISBN 978-1-58562-493-5 Hardcover \$230.00 • Item #62493

2016 • 1,205 pages • ISBN 978-1-61537-020-7 eBook • \$184.00 • Item #37020

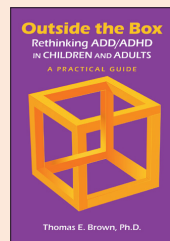

## Outside the Box: Rethinking ADD/ADHD in Children and Adults

*A Practical Guide*

Thomas E. Brown, Ph.D.

The book is based upon current scientific research but also on the experience and perspective of the author, a clinician who has devoted more than 35 years to studying this disorder formally and countless hours to engaging with and providing treatment for a diversity of children, teenagers, and adults with ADHD and related problems.

2017 • 334 pages • ISBN 978-1-58562-427-0 • Paperback • \$59.00 • Item #62427

2017 • 334 pages • ISBN 978-1-61537-134-1 • eBook • \$47.00 • Item #37134

AMERICAN  
PSYCHIATRIC  
ASSOCIATION  
PUBLISHING

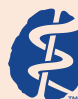

[www.appi.org](http://www.appi.org)

Email: [appi@psych.org](mailto:appi@psych.org)

Toll Free: 1-800-368-5777

20% Discount for American Psychiatric Association Members

25% Discount for APA Resident-Fellow Members

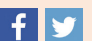

Priority Code AH1809
